# Supplementary material for: MiR-302 Regulates Glycolysis to Control Cell-Cycle during Neural Tube Closure
Source: PubMed Central journal article supplement (PMC7589003; doi:10.3390/ijms21207534), 2020-10-13
Supplement: ijms-21-07534-s001.pdf [file ijms-21-07534-s001.pdf]

## Supplementary Figures

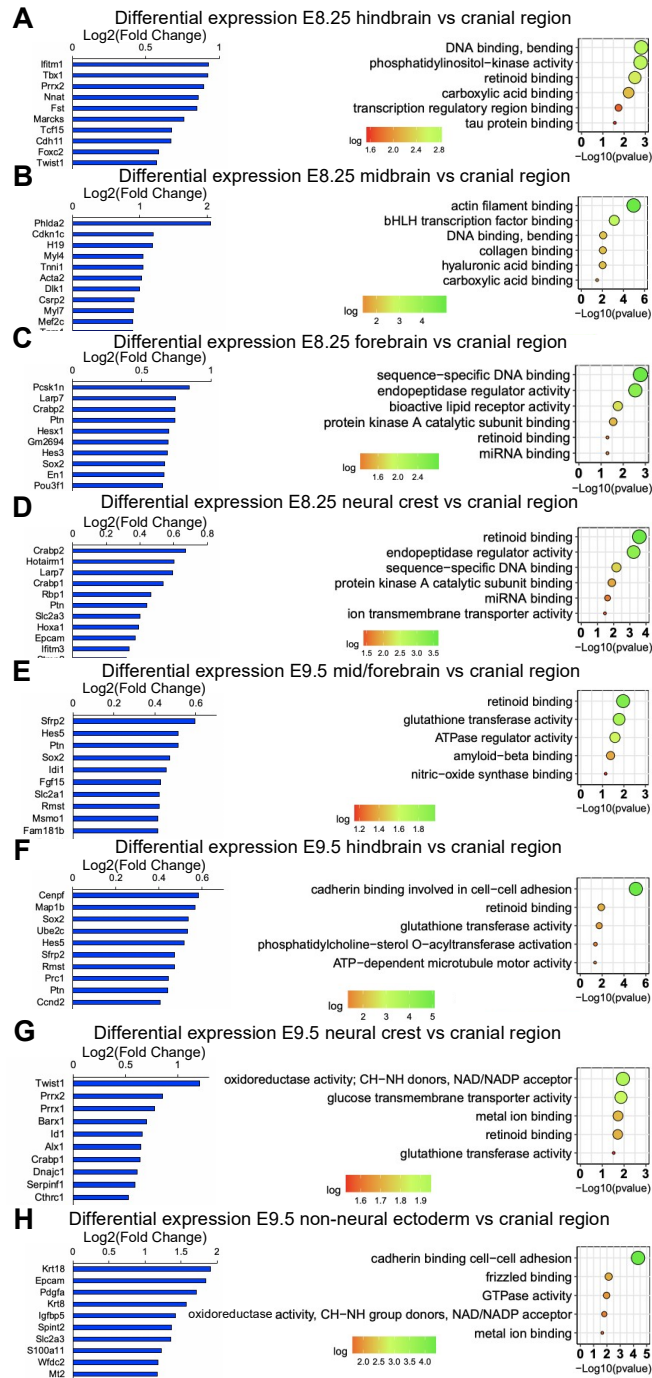

**Supplemental Figure 1.** Metabolism and differentiation are coupled during neurulation. (A) Bar plot of differentially expressed genes for the comparison of each ectoderm-derived cell population against the rest of the ectoderm-derived and non-ectoderm-derived cells of the cranial region, followed by molecular gene ontology for the E8.25 hindbrain, (B) E8.25 midbrain, (C) E8.25 forebrain, (D) E8.25 neural crest, (E) E9.5 forebrain/midbrain, (F) E9.5 hindbrain, (G) E9.5 neural crest, and (H) E9.5 non-neural ectoderm.

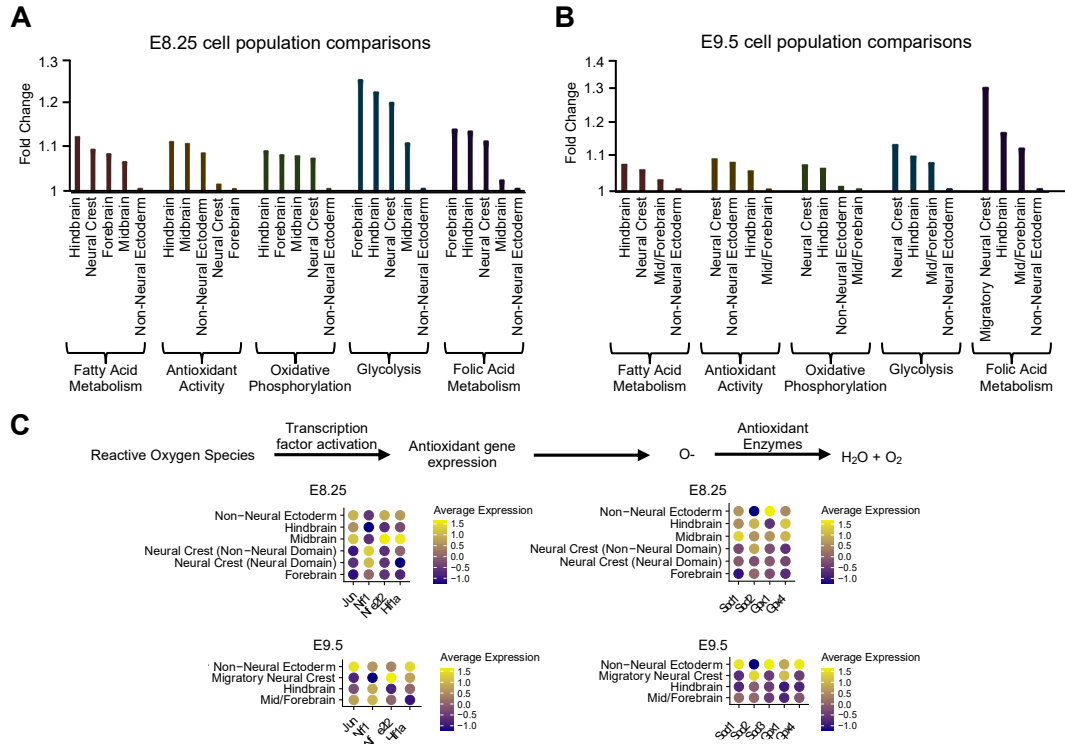

**Supplemental Figure 2.** Single-cell sequencing reveals metabolic contributions to neural tube closure. (A) Bar plot showing gene enrichment for metabolic pathways at E8.25 and (B) E9.5. Average expression of each cell population was normalized to that with the lowest expression for each metabolic pathway. (C) Dot plots showing expression of redox transcription factors and antioxidant enzymes in ectoderm-derived cell populations at E8.25 and E9.5.

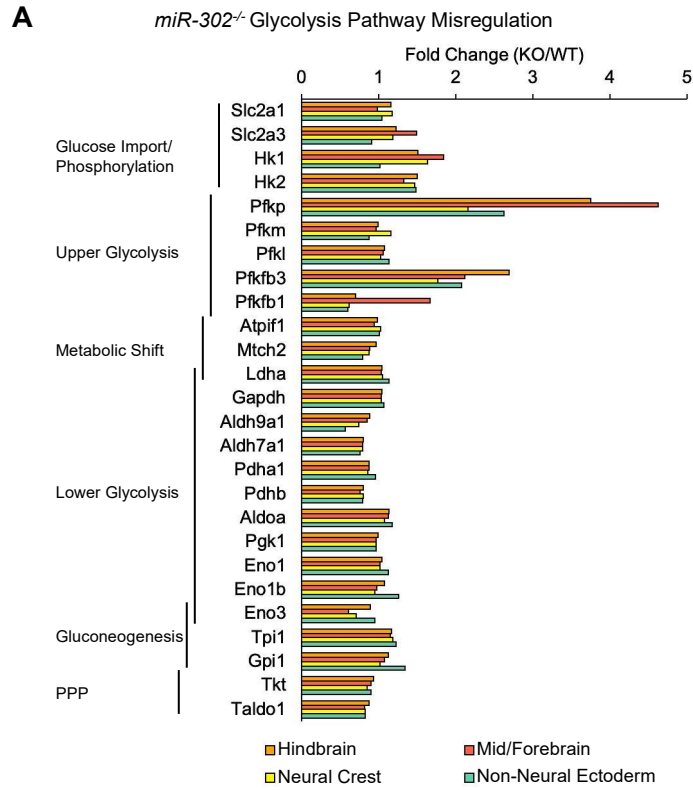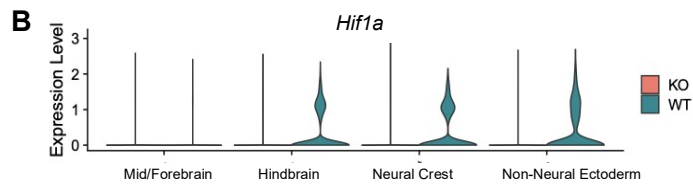

**Supplemental Figure 3.** Upper glycolysis is regulated by *miR-302*. (A) Bar plot of the misregulated genes of the various glycolysis pathway divisions in the *miR-302* knockout ectoderm-derived cell populations. (B) Violin plot of *Hif1a* misregulation in the *miR-302* knockout.

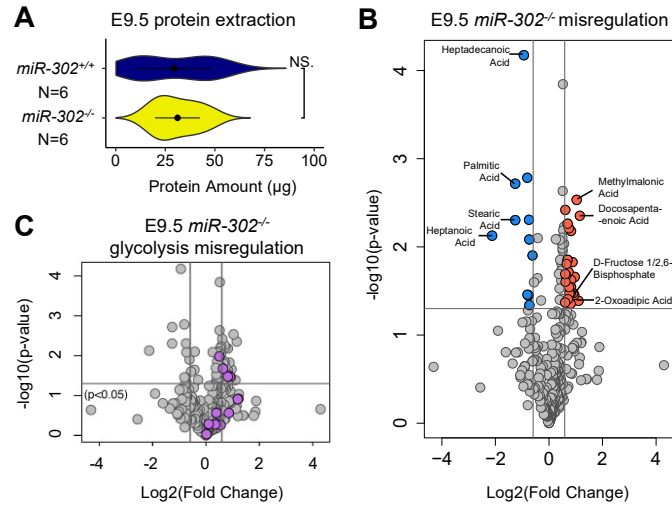

**Supplemental Figure 4.** Loss of *miR-302* leads to an increase of glycolytic intermediates. (A) Violin plot of the total amount of protein harvested from the cranial regions of wildtype and *miR-302* knockout embryos for mass spectrometry. (B) Volcano plot showing significantly up- and down-regulated metabolites of the *miR-302* knockout. (C) Volcano plot showing the upregulation of glycolysis metabolites.

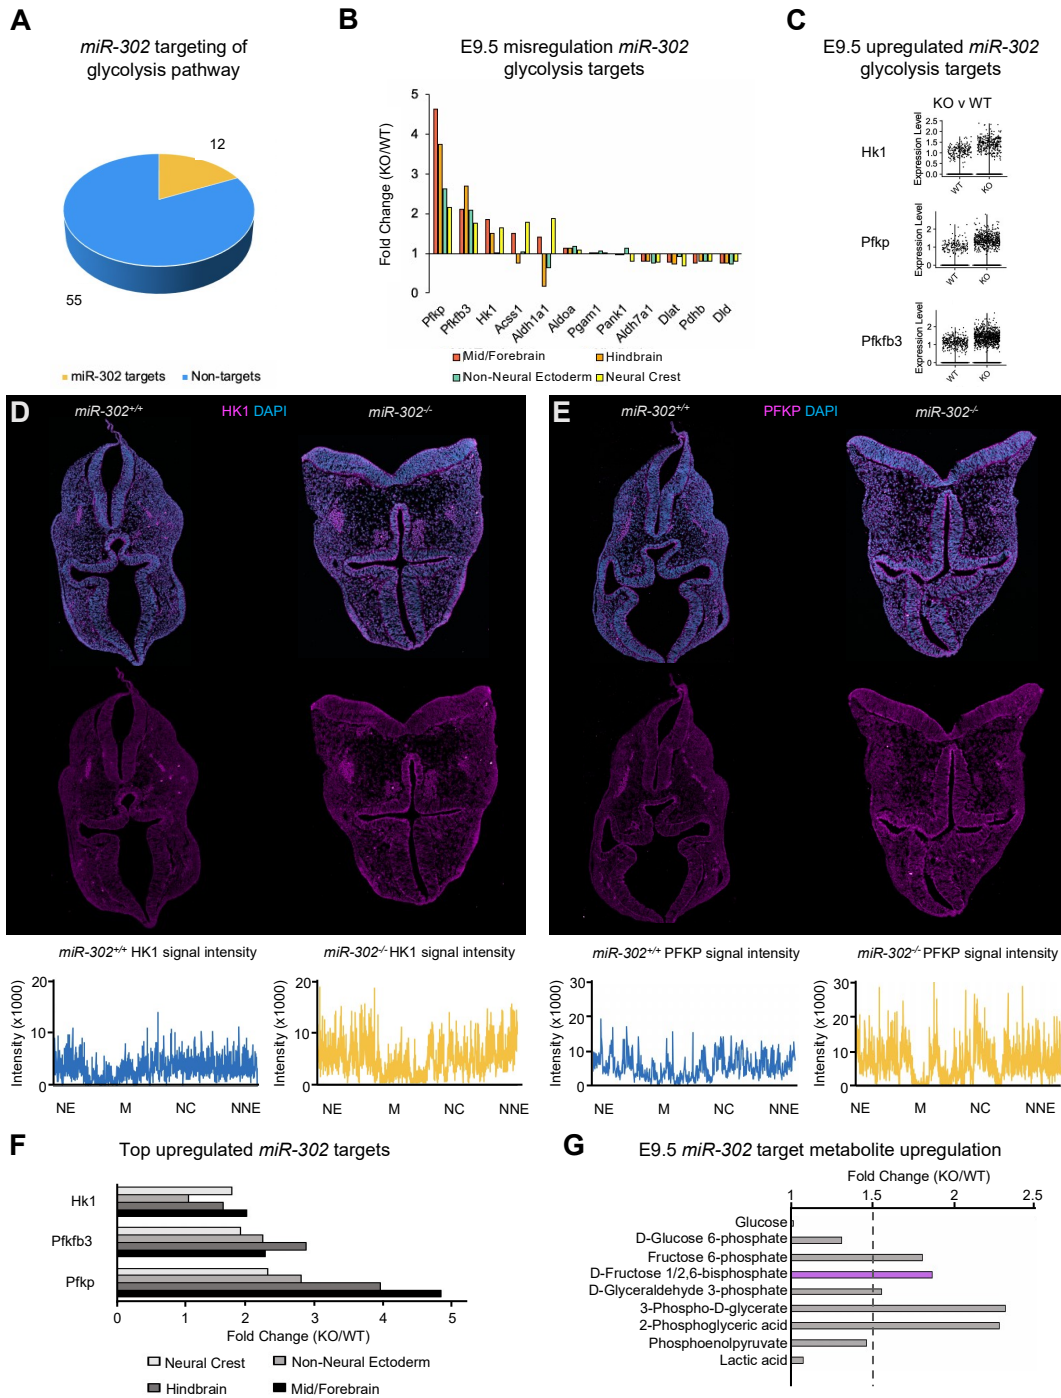

**Supplemental Figure 5.** *miR-302* targets *Pfkp*, *Pfkfb3*, and *Hk1* to regulate upper glycolysis. (A) Pie chart showing that *miR-302* targets 12 genes within the glycolysis pathway. (B) Bar plot showing the upregulation of *miR-302* targets within the glycolysis pathway across each ectoderm-derived cell population. (C) Dot plots showing expression of *Pfkp*, *Pfkfb3*, and *Hk1* in wildtype and *miR-302* knockout embryos. (D) Immunofluorescence for HK1 and (E) PFKP in wildtype and *miR-302* knockout embryos. Intensity measurements were taken across comparable regions of embryos and was plotted to highlight increase in intensity of signal upon *miR-302* deletion. (F) Bar plot of the top three upregulated *miR-302* targets *Pfkp*, *Pfkfb3*, and *Hk1* in each ectoderm-derived cell population. (G) bar plot showing the only significantly upregulated glycolysis metabolite with a fold change >1.5 is that produced by upregulated *miR-302* target *Pfkfb3*.

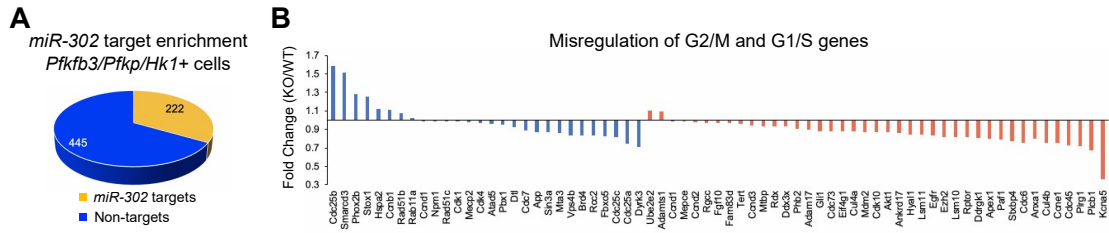

**Supplemental Figure 6.** *miR-302* targets *Pfkp*, *Pfkfb3*, and *Hk1* to regulate cell proliferation. (A) Pie chart of the number of *miR-302* targets and non-targets obtained as differentially expressed genes from the differential expression analysis of *Pfkfb3/Pfkp/Hk1+* cells. (B) Bar plot showing the misregulation of cell cycle transition genes upon *miR-302* deletion.

### Supplementary Tables

**Supplementary Table 1:** Genes used for identification of ectoderm-derived cell populations.

| Neural Crest | Fore/Midbrain | Hindbrain | Non-neural Ectoderm |
|--------------|---------------|-----------|---------------------|
| Sox9         | Otx2          | Pax3      | Cdh1                |
| Pax3         | Cdh2          | Sox1      | Krt8                |
| Pax7         | Pax6          | Cdh2      | Krt18               |
| Sox10        | Pax5          | En1       | Epcam               |
| Tfap2a       | Fgf15         | Fgf15     | Trp63               |
| Cdh1         |               | En2       | Grhl2               |
| Ets1         |               |           |                     |
| Snai2        |               |           |                     |
| Msx1/2       |               |           |                     |
| Id3          |               |           |                     |
